# Supplementary material for: Non-covalent interaction of benzene with methanol and diethyl ether solid surfaces
Source: Royal Society of Chemistry journal article supplement (doi:10.1039/c6cp01787h), 2016-01-01
Supplement: c6cp01787h1.pdf [file c6cp01787h1.pdf]

## Electronic Supplementary Information (ESI):

# Non-covalent Interaction of Benzene with Methanol and Diethyl Ether Solid Surfaces<sup>†</sup>

Demian Marchione<sup>\*a</sup> and Martin R. S. McCoustra<sup>a</sup>

### 1 TPD Experiments

Raw temperature programmed desorption (TPD) data appear to be the combination of two signals; one is desorption from the sample mount, more precisely from the heating wires, while the other corresponds to sublimation of the sample from the substrate. Any distinction between these two becomes less marked at large exposures because the signal derived from the wires does not decay quickly enough to zero and overlaps with the incipient desorption from the sample. In order to resolve the two signals from one another, the experimental points at base temperature and those in the leading edge region were fitted with an exponential function (**Figure S1**). The resulting curve was then used to estimate

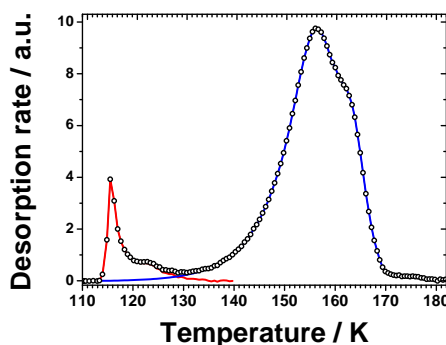

**Figure S1:** TPD traces of 0.5 L of  $C_6H_6$  deposited on a thick  $CH_3OH$  film (200 L). The contribution to the overall signal from the wires and the substrate are reported with red and blue lines respectively, while the raw data as black open circles.

the signal from the wires and subtracted from the overall trace to give a “cleaned” trace, which should be a reasonable representation of the TPD trace specific to the substrate. This procedure has the drawback of forcing a mono-exponential trend that describes the desorption rate over a certain temperature range where the leading edge of the desorption

<sup>\*a</sup>Institute of Chemical Sciences, Heriot-Watt University, EH14 4AS, Edinburgh, UK;

E-mail: marchionedemian@gmail.com

<sup>a</sup>Institute of Chemical Sciences, Heriot-Watt University, EH14 4AS, Edinburgh, UK; E-mail: mrsml@hw.ac.uk

peak is most sensitive. The more benzene ( $C_6H_6$ ) is deposited, the larger is the error introduced by the fitting function simply because the overlap between the two features becomes more and more significant.

This procedure affects the leading edge analysis especially when applied to TPD curves corresponding to higher  $C_6H_6$  exposures. Therefore, we can only attempt a semi-quantitative analysis for peak A in **Figure 1** of the article as displayed by the Arrhenius plots in **Figure S2** corresponding to the TPD traces between 0.02 L and 0.5 L of  $C_6H_6$  on 200 L of  $CH_3OH$ . The Arrhenius plots were obtained by rewriting the Polanyi-Wigner equation,

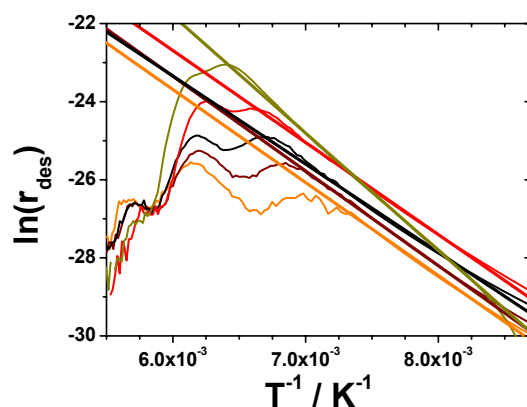

**Figure S2:** Arrhenius plots of  $\ln(r_{des})$  against  $1/T$  corresponding to the TPD traces of  $C_6H_6$  on 200 L of  $CH_3OH$ .  $C_6H_6$  exposures are 0.02 L (orange), 0.05 L (brown), 0.1 L (black), 0.2 L (red), 0.5 L (dark yellow). The best linear fit is reported along the experimental traces, and for each coverage going from the lowest dose to the highest, the desorption energies are:  $20 \pm 2 \text{ kJ mol}^{-1}$ ,  $20 \pm 2 \text{ kJ mol}^{-1}$ ,  $19 \pm 2 \text{ kJ mol}^{-1}$ ,  $20 \pm 2 \text{ kJ mol}^{-1}$ ,  $25 \pm 2 \text{ kJ mol}^{-1}$ .

eqn (1a),<sup>1,2</sup> in its logarithmic form as a function of  $1/T$ , eqn (1b):

$$r_{des} = -\frac{dN_{ads}}{dt} = \frac{v_n N_{ads}^n}{\beta} e^{-\frac{E_{des}}{RT}} \quad (1a)$$

$$\ln(r_{des}) = \ln\left(\frac{v_n}{\beta}\right) + \ln(N_{ads}^n) - \left(\frac{E_{des}}{R}\right) \times \frac{1}{T} \quad (1b)$$

where  $r_{des}$  is desorption rate,  $N_{ads}$  is the surface coverage of adsorbate in molecules  $\text{cm}^{-2}$ ,  $v_n$  is the pre-exponential factor for a desorption process having order  $n$ ,  $\beta$  is the heating rate in  $\text{K s}^{-1}$ ,  $E_{des}$  is the desorption energy in  $\text{J mol}^{-1}$ ,  $R$  is the gas constant in  $\text{J K}^{-1} \text{mol}^{-1}$ , and  $T$  is the temperature. Analysis using eqn (1b) yields a straight line in the leading edge region with the slope containing the desorption energy,  $E_{des}$ . It follows that a value of  $21 \pm 2 \text{ kJ mol}^{-1}$  is obtained for the desorption energy of Peak A. It should be stressed once again that in order to deconvolve the the signal coming from the sample

mounting and desorption from the substrate itself, the data had to be carefully processed. This procedure may have particularly affected the 0.5 L trace (highest coverage used for the analysis) resulting in a desorption energy ( $25 \pm 2 \text{ kJ mol}^{-1}$ ) that is slightly larger than the average value ( $21 \pm 2 \text{ kJ mol}^{-1}$ ). However, whether this value is discarded or not, the average remains unchanged within the error bars.

Furthermore, we tried to fit the TPD traces displayed in **Figure 1** of the main article using Gaussian or Lorentzian functions. However, the results showed no improvement to the analysis of the data, but the procedure actually added more sources of error. For instance, one attempt was to fit each peak (A, B and C) with a Gaussian, while keeping C constant. However, as the benzene dose increases, the fitting procedure tends to “compress” the Gaussian corresponding to peak A (**Figure S3**) resulting in an unnatural behaviour that has no real physical meaning and has the only advantage of reducing the  $\chi^2$ .

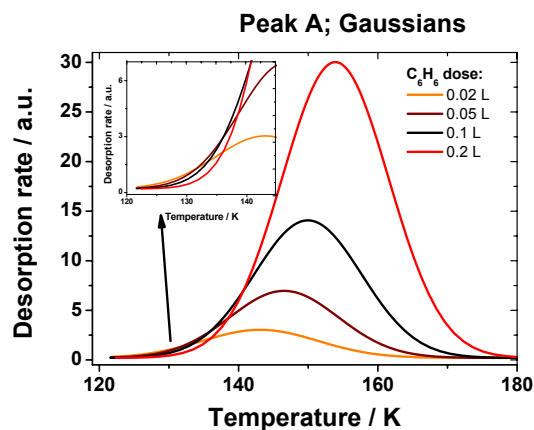

**Figure S3:** Gaussian fits for peak A observed in the TPD traces of  $\text{C}_6\text{H}_6$  on 200 L of  $\text{CH}_3\text{OH}$ .  $\text{C}_6\text{H}_6$  exposures are 0.02 L (orange), 0.05 L (brown), 0.1 L (black), and 0.2 L (red). The inset highlights the unnatural narrowing of the Gaussian in order to improve the fit of the cumulative peak with the experimental trace.

Furthermore, given the fact that this feature has a nearly zero-order desorption kinetics, then a Gaussian or a Lorentzian would not accurately describe the whole desorption profile. Most importantly, the systematic change in the leading edge of the fitting function as a function of the  $\text{C}_6\text{H}_6$  dose would severely affect a leading edge analysis; perhaps even more than the method originally employed in the manuscript. Even using Lorentzian functions brought no improvement to the description of Peak A in any way (results not shown). In conclusion, it is not feasible to isolate the contributions to the desorption profile (peak A and B) by using standard fitting functions (*e.g.* Gaussian and Lorentzians). Perhaps kinetic simulations would be needed in order to correctly isolate and model the experimental data.

Peak B in **Figure 1** of the main article is assigned to strongly hydrogen bonded  $\text{C}_6\text{H}_6$

molecules at the  $\text{CH}_3\text{OH}$  interface. The corresponding desorption energy was estimated by using the Redhead equation.<sup>3</sup> Depending on what value is chosen for the pre-exponential factor ( $\nu_1$ ),  $10^{12} \text{ s}^{-1}$  or  $10^{13} \text{ s}^{-1}$ , two possible estimates of  $E_{des}$  are possible:  $39 \pm 1 \text{ kJ mol}^{-1}$  and  $42 \pm 1 \text{ kJ mol}^{-1}$ . In principle both the choices are sensible:  $10^{12} \text{ s}^{-1}$  is typically assumed for physisorbed species, whereas  $10^{13} \text{ s}^{-1}$  can be assumed for chemisorbed species. Hydrogen bonds represent a borderline situation, therefore both the values for  $\nu_1$  were employed in our analysis.

In the discussion of the TPD data corresponding to low exposures of  $\text{C}_6\text{H}_6$  on a thick film of methanol ( $\text{CH}_3\text{OH}$ ), we stressed that different desorption behaviours are observed when the same experiment is repeated multiple times. Inconsistency spans over the whole range of  $\text{C}_6\text{H}_6$  exposures investigated (0.01 L - 50 L), with larger discrepancies at sub-monolayer level (0.01 L - 0.5 L). In the latter case, as also shown in **Figure 1** of the main article and in **Figure S4**, three features can be observed in the TPD traces up to 1 L: a low temperature peak between 140 K and 155 K, another peak between 160 K and 170 K, and a small high temperature shoulder above 170 K that is saturated already at 0.01 L. The first two peaks compete with each other as displayed in **Figure S4** for the 0.1 L

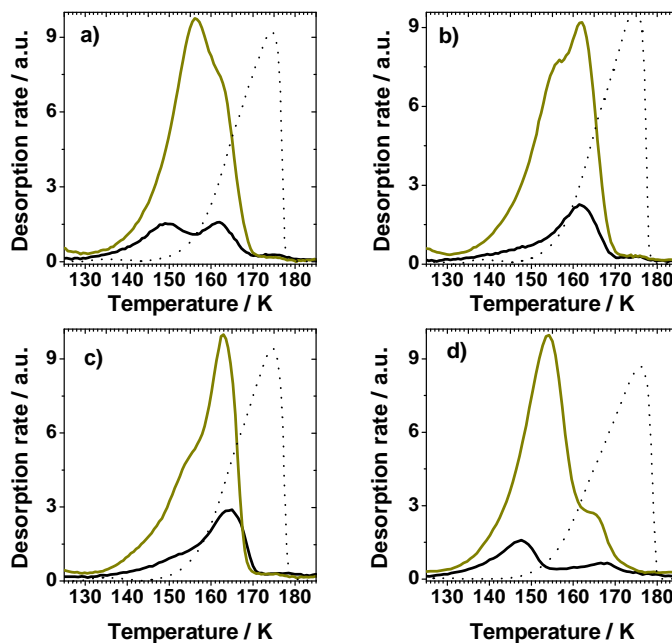

**Figure S4:** TPD traces of 0.1 L (black line) and 0.5 L (dark yellow line) of  $\text{C}_6\text{H}_6$  deposited on a thick  $\text{CH}_3\text{OH}$  film (200 L). The dotted line is the scaled  $\text{CH}_3\text{OH}$  TPD trace underlying the  $\text{C}_6\text{H}_6$ . The four replications show different outcomes of the experiment.

and 0.5 L traces, resulting in four possible outcomes. In the upper panels the two features co-exist with the slight predominance of one over the other; in the lower panels only one of the two peaks clearly emerges while the other is just a shoulder. It should be noted that occasional variations of the heating ramp within the data set cannot explain the observed behaviour, which depends on small, unidentified changes in the experimental conditions (*e.g.* film deposition rate and structure). Therefore, an unusual number of replications of TPD experiments are required in order to obtain a consistent behaviour such as the one showed in **Figure 1** of the main article and allowing a more accurate determination of the desorption energies.

The TPD traces so far discussed and those displayed in the left panel of **Figure S5** correspond to  $C_6H_6$  coverages in the sub-monolayer regime. In fact, assuming a layer-by-layer

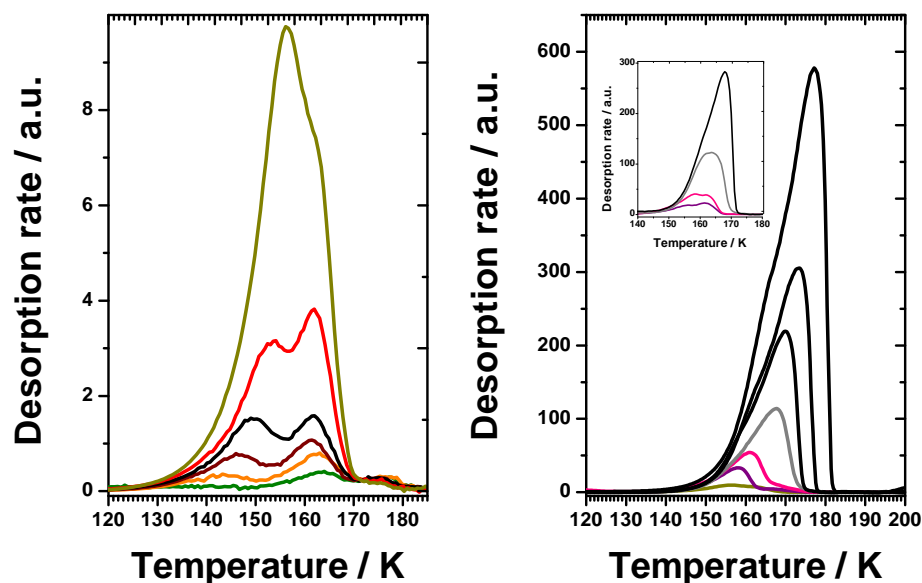

**Figure S5:** TPD traces for  $C_6H_6$  desorption from a thick ice of  $CH_3OH$  (200 L). The exposures of  $C_6H_6$  that are displayed are: 0.01 L in green, 0.02 L in orange, 0.05 L in brown, 0.1 L in black, 0.2 L in red, 0.5 L in dark yellow. for the left panel. In the right panel  $C_6H_6$  doses are 0.5 L, 1 L (in violet), 2 L (in pink) and 5 L (in dark grey), 10 L, 20 L and 50 L (in black). The inset shows an alternative desorption behaviour for the TPD traces corresponding to 1 L, 2 L, 5 L and 10 L of  $C_6H_6$ .

growth mechanism, one monolayer corresponds to *ca.* 15 L. This is obtained by using the same procedure employed by Scott Smith *et al.* to define 1 monolayer of  $CH_3OH$  on graphene<sup>4</sup>. First we took the  $2/3$  root of the  $C_6H_6$  molecular density<sup>5</sup> ( $8.57 \times 10^{21}$  molecule  $cm^{-3}$ ) and then compare this with  $Z_{wt}$  as in **Equation 1** of the main article. However, such hypothesised growth mechanism was not observed for the investigated system, and hence, no precise exposure can be assigned to one uniform monolayer of  $C_6H_6$

on  $\text{CH}_3\text{OH}$ . In contrast, it was possible to define the 5 L dose as an upper limit for the appearance of the multilayer because this is the highest exposure where the high temperature and the low temperature features might not be merged together (see inset in **Figure S5**). At 10 L and above only one peak, that corresponds to multilayer desorption, is noted (right panel of **Figure S5**).

**Figure S6** displays the TPD data for 1 L, 2 L, 5 L and 10 L of diethyl ether ( $\text{CH}_3\text{CH}_2\text{OCH}_2\text{CH}_3$ ) on top of a thick  $\text{C}_6\text{H}_6$  ice (200 L). The observed desorption behaviour is rather

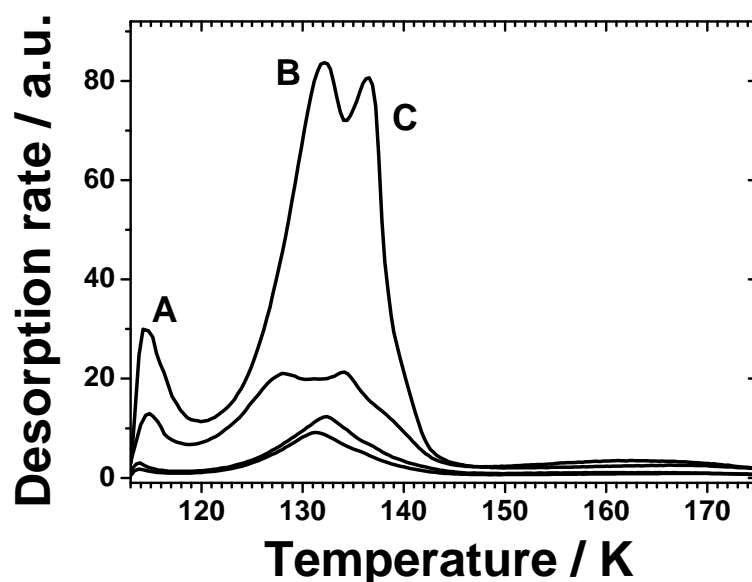

**Figure S6:** TPD traces of 1 L, 2 L, 5 L and 10 L of  $\text{CH}_3\text{CH}_2\text{OCH}_2\text{CH}_3$  deposited on a thick  $\text{C}_6\text{H}_6$  film (200 L).

complex and its detailed description is beyond the scope of the present work. However, there are few things that can be said. The sharp peak labelled as **A** is undesired signal from the sample mounting as already discussed. Peak **C** might correspond to desorption of a second layer of  $\text{CH}_3\text{CH}_2\text{OCH}_2\text{CH}_3$ . In **Figure 5** of the main article the temperature of the maximum shifts to lower values as the coverage increases up to 1 L. This trend is noted to change in **Figure S6**, when larger doses are taken into account, as the maximum of peak **C** moves towards higher temperatures going from 1 L up to 10 L. The lower temperature feature, Peak **B**, which appears at some point between 2 L and 5 L, grows rapidly in intensity by going from 5 L to 10 L and could be due to desorption of the multilayer. This assignment is proposed by comparison with TPD data (not shown) of  $\text{CH}_3\text{CH}_2\text{OCH}_2\text{CH}_3$  pre-deposited directly on the steel substrate at similar coverages. The desorption behaviour of  $\text{CH}_3\text{CH}_2\text{OCH}_2\text{CH}_3$  from steel is analogous to what observed on  $\text{C}_6\text{H}_6$  with the sole difference of peak **C** which was not observed in the former case. In conclusion, it is clear

that regarding the  $\text{CH}_3\text{CH}_2\text{OCH}_2\text{CH}_3/\text{C}_6\text{H}_6$  system, the transition towards the multilayer commences above 1 L, and hence the data presented in **Figure 4** of the main article are relevant to the sub-monolayer regime.

In addition to this, it is possible to estimate that 1 ML is equivalent to *ca.* 10 L, 9.2 L precisely. This was calculated in a similar fashion as it has been done with  $\text{C}_6\text{H}_6$ . First we assumed that the liquid bulk density ( $5.80 \times 10^{21}$  molecules  $\text{cm}^{-3}$ ) of  $\text{CH}_3\text{CH}_2\text{OCH}_2\text{CH}_3$ <sup>1</sup> was the same as in the pure solid. Then, by taking the 2/3 root of such molecular density as 1 ML we estimate that, for  $\text{CH}_3\text{CH}_2\text{OCH}_2\text{CH}_3$ , 1 ML is 9.2 L. Therefore, the exposures probed in **Figure 4** of the main article range between 0.005 ML and 0.1 ML. Given these very low fractional numbers and the assumption behind the definition of one equivalent monolayer, it is desirable to keep the notation based on raw exposure units (Langmuirs) which are plain and simple, free from any assumption of whichever sort. The case of the TPD data of ether on benzene are quite explanatory on this matter. As discussed for **Figure S6**, the desorption behaviour attributed to  $\text{CH}_3\text{CH}_2\text{OCH}_2\text{CH}_3$  as multilayer appears at some point between 2 L and 5 L, whereas if one uses units of equivalent monolayer 9.2 L is identified as a complete monolayer. This equivalence can be misleading and is in contrast with what is shown by TPD data. In conclusion, in order to avoid misinterpretation of the data, Langmuir units are used throughout the main article instead of equivalent monolayers.

## 2 RAIR spectra

The multilayer RAIR spectrum of  $\text{CH}_3\text{OH}$  (200 L) deposited on the stainless steel substrate at base temperature is shown in **Figure S7**. The assignment of the vibrational modes is also reported in the figure caption and agrees well with literature values<sup>6</sup>. The frequency of the maximum for the CO stretch and its band-profile are consistent with the film being mainly amorphous. Following further annealing of the film at higher temperatures, e.g. 120 K for 100 s, the CO band splits and shifts towards lower wavenumbers consistently with the enhancement of the crystalline phase in the solid  $\text{CH}_3\text{OH}$ <sup>7</sup>.

**Figure S8** displays the multilayer RAIR spectrum corresponding to 200 L of  $\text{CH}_3\text{CH}_2\text{OCH}_2\text{CH}_3$  deposited on the steel substrate at *ca.* 107 K, consistently with a crystalline film. Maxima of the IR frequencies are listed in **Table S1** and match the reported data of  $\text{CH}_3\text{CH}_2\text{OCH}_2\text{CH}_3$  on Ru(0001)<sup>8</sup> and on Cu(111)<sup>9</sup>.

**Figures S9** and **S10** display the evolution of the  $\text{C}_6\text{H}_6$  IR signatures as the ice grows on

<sup>1</sup>Density of the liquid phase, Sigma-Aldrich

| Assignment                                          | IR Frequencies / $\text{cm}^{-1}$ |                       |                      |
|-----------------------------------------------------|-----------------------------------|-----------------------|----------------------|
|                                                     | This work                         | Ru(0001) <sup>8</sup> | Cu(111) <sup>9</sup> |
| $\rho(\text{CH}_3 + \text{CH}_2)$                   | 822                               | 827                   | 830                  |
|                                                     | 828                               |                       |                      |
| $\nu_s(\text{COC})$ [ $\nu\text{CC}$ ]              | 843                               | 849                   | 848                  |
|                                                     | 849                               |                       |                      |
|                                                     | 851                               |                       |                      |
| $\nu(\text{CC} + \text{CO}) + \rho(\text{CH}_3)$    | 932                               | 935                   | 937                  |
|                                                     | 940                               |                       |                      |
| $2\rho(\text{CH}_3) + \nu(\text{CC})$               | 1045                              | 1048                  | 1046                 |
|                                                     | 1048                              |                       |                      |
| $\nu_a(\text{COC})$ [ $\nu\text{CO}$ ]              | 1115                              | 1120                  | 1122                 |
|                                                     | 1126                              |                       |                      |
| $\rho(\text{CH}_3) + \nu(\text{CO})$                | 1153                              | 1159                  | 1159                 |
| + $\nu(\text{CC})$ + bends                          | 1159                              |                       |                      |
| $\rho(\text{CH}_2 + \text{CH}_3)$                   | 1170                              | 1176                  | 1178                 |
|                                                     | 1175                              |                       |                      |
| $\rho(\text{CH}_2)$ twist                           | 1279                              | 1283                  | 1285                 |
|                                                     | 1283                              |                       |                      |
| $\delta_s(\text{CH}_3) + \delta(\text{CH}_2)_{o,p}$ | 1348                              | 1346                  | 1350                 |
|                                                     | 1352                              |                       |                      |
| $\delta_s(\text{CH}_3)$                             | 1369                              | 1370                  | 1372                 |
|                                                     | 1373                              |                       |                      |
| $\delta_a(\text{CH}_3) + \delta(\text{CH}_2)_{o,p}$ | 1381                              | 1382                  | 1385                 |
|                                                     | 1388                              |                       |                      |
| $\delta_a(\text{CH}_3)_{o,p}$                       | 1441                              | 1441                  | 1442                 |
|                                                     | 1447                              |                       |                      |
| $\delta_a(\text{CH}_3)_{i,p}$                       | 1456                              |                       | 1459                 |
|                                                     | 1459                              | 1458                  |                      |
|                                                     | 1468                              | 1468                  |                      |
| $\delta_a(\text{CH}_2)$ scissoring                  | 1498                              | 1489                  | 1491                 |
| $\nu_s(\text{CH}_3) + \nu_s(\text{CH}_2)$           | 2851, 2860                        | 2856                  |                      |
| + $2 \times \delta(\text{CH}_3)$                    | 2873                              | 2872                  | 2875                 |
|                                                     | 2886, 2896                        | 2900                  |                      |
| $\nu_a(\text{CH}_2)$                                | 2932                              | 2932                  | 2934                 |
| $\nu_a(\text{CH}_3)$                                | 2972 (2803)                       | 2970                  | 2971                 |
|                                                     | 2982 (2777)                       | 2987                  | 2992                 |
|                                                     | 2990 (2689, 2693)                 |                       |                      |

**Table S1:** List of vibrational modes of 200 L of  $\text{CH}_3\text{CH}_2\text{OCH}_2\text{CH}_3$  multilayer adsorbed on steel at 107 K. Out-of-plane modes are labelled with the initials *o.p.*, while *s.* stands for symmetric and *a.* stands for asymmetric.



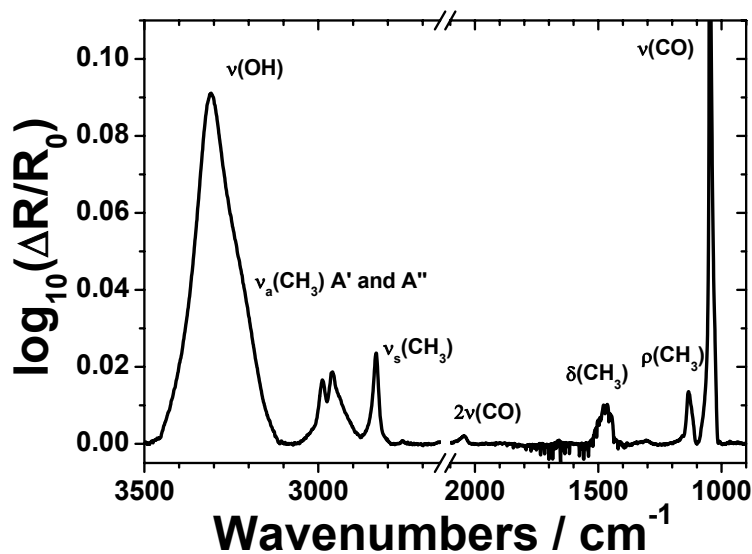

**Figure S7:** RAIR spectrum of the multilayer  $\text{CH}_3\text{OH}$  film (200 L;  $\sim 15.2$  nm) grown on stainless steel at 107 K.  $\text{CH}_3\text{OH}$  vibrations are labelled as follows:  $\nu(\text{OH})$  is the OH stretching peaking at  $3308\text{ cm}^{-1}$ ;  $\nu_a(\text{CH}_3)$  is the asymmetric methyl stretching mode with symmetry  $A'$  peaking at  $2988\text{ cm}^{-1}$ ;  $\nu_a(\text{CH}_3)$  at  $2959\text{ cm}^{-1}$  is the asymmetric methyl stretching mode with symmetry  $A''$ ;  $\nu_s(\text{CH}_3)$  at  $2959\text{ cm}^{-1}$  is the symmetric methyl stretching mode centered at  $2834\text{ cm}^{-1}$ ;  $2\nu(\text{CO})$  is the CO stretching overtone at  $2043\text{ cm}^{-1}$ ; The methyl bend,  $\delta(\text{CH}_3)$ , is found at  $1464\text{ cm}^{-1}$ , and might also include a minor contribution of the COH bending mode at  $\sim 1510\text{ cm}^{-1}$ ;  $\rho(\text{CH}_3)$  is the rocking mode at  $1134\text{ cm}^{-1}$ ;  $\nu(\text{CO})$  is the CO stretching mode peaking at  $1047\text{ cm}^{-1}$ . The negative sharp features between  $1800\text{ cm}^{-1}$  and  $1400\text{ cm}^{-1}$  are due to the bending modes of gaseous water ( $\text{H}_2\text{O}$ ) in the air side of the chamber, in the IR path to the detector.

top of a thick film of  $\text{CH}_3\text{OH}$  (200 L) or  $\text{CH}_3\text{CH}_2\text{OCH}_2\text{CH}_3$  (200 L) respectively. These plots clearly show that only the ring modes are detected below 5 L of  $\text{C}_6\text{H}_6$ , while all the other bands appear in the multilayer regime between 5 L and 20 L. The assignment of the  $\text{C}_6\text{H}_6$  modes is reported in **Table S2** and is based on the recorded spectra corresponding to the thickest ices.

The agreement with previously reported values is good, with small shifts of 2 - 3  $\text{cm}^{-1}$ , confirming that at large exposures (*e.g.*  $\geq 20$  L) bulk  $\text{C}_6\text{H}_6$  is observed. These changes in the peak positions can be easily explained in terms of experimental error (resolution of 2  $\text{cm}^{-1}$ ), different film thicknesses<sup>10</sup>, and techniques<sup>11</sup> (*e.g.* transmission IR instead of RAIRS). Additional features observed at high frequencies above  $3000\text{ cm}^{-1}$  could arise from bulk behaviour of crystalline  $\text{C}_6\text{H}_6$ . The difference of 4  $\text{cm}^{-1}$  observed for the peak maximum corresponding to the in-plane methyl bending mode ( $\delta(\text{CH})_{i.p.}$ ) is due to its broad band profile when the substrate is solid  $\text{CH}_3\text{OH}$  instead of  $\text{CH}_3\text{CH}_2\text{OCH}_2\text{CH}_3$ . In fact, both the CH bends at  $1039\text{ cm}^{-1}$  and  $691\text{ cm}^{-1}$  are sharper for  $\text{C}_6\text{H}_6/\text{CH}_3\text{CH}_2\text{O}$

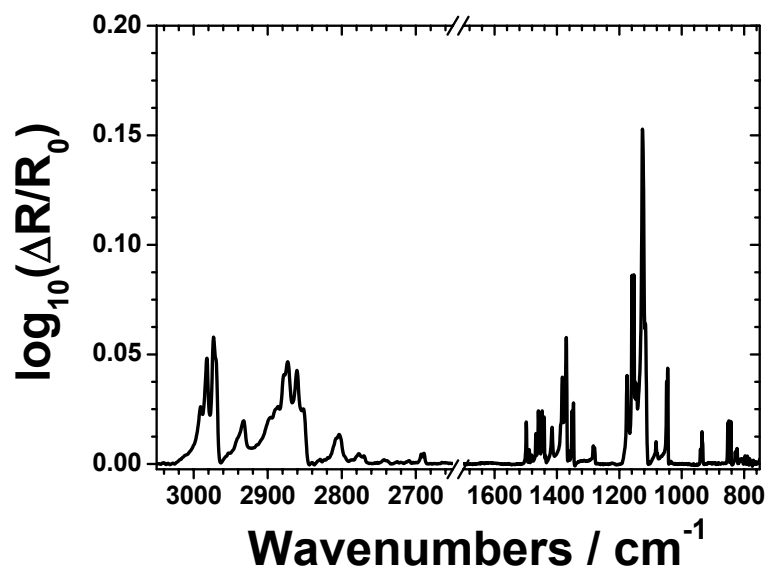

**Figure S8:** RAIR spectrum of the multilayer  $\text{CH}_3\text{CH}_2\text{OCH}_2\text{CH}_3$  film (200 L,  $\sim 12.1$  nm) grown on stainless steel.

$\text{CH}_2\text{CH}_3$  than for  $\text{C}_6\text{H}_6/\text{CH}_3\text{OH}$ . This might be linked to the growth mechanism of the  $\text{C}_6\text{H}_6$  film on the two ices. Island formation on  $\text{CH}_3\text{OH}$  is compatible with a larger degree of heterogeneity of polycrystalline  $\text{C}_6\text{H}_6$ , while the aromatic molecules grow as larger and more uniform crystallites on  $\text{CH}_3\text{CH}_2\text{OCH}_2\text{CH}_3$ , therefore displaying sharper peaks.

| Assignment                 | IR Frequencies / $\text{cm}^{-1}$ |                                                    |                                 |                                   |                              |
|----------------------------|-----------------------------------|----------------------------------------------------|---------------------------------|-----------------------------------|------------------------------|
|                            | on $\text{CH}_3\text{OH}$         | on $\text{CH}_3\text{CH}_2\text{OCH}_2\text{CH}_3$ | on $\text{SiO}_2$ <sup>10</sup> | on $\text{Si}(111)$ <sup>11</sup> | on $\text{Al}$ <sup>12</sup> |
| $\delta(\text{CH})_{o.p.}$ | 689                               | 691                                                | 690                             | 688                               | 678                          |
| $\delta(\text{CH})_{i.p.}$ | 1040 <sup>†</sup><br>1029         | 1039<br>1033                                       | 1037                            | 1040                              | 1038                         |
| $\nu(\text{CC})$           | 1479<br>1475                      | 1477<br>1475                                       | 1480                            | 1481                              |                              |
| Combination 4              | 1837                              | 1838                                               | 1832                            | 1836                              | 1812                         |
| Combination 3              | 1977                              | 1975                                               | 1973                            | 1980                              | 1957                         |
| Combination 2              | 3030<br>3037                      | 3031<br>3037                                       | 3027                            | 3036                              | 3043                         |
| Combination 1              | 3067                              | 3068                                               | 3065                            |                                   | 3075                         |
| $\nu(\text{CH})$           | 3085<br>3092                      | 3068<br>3092                                       | 3082                            | 3088                              | 3095                         |

**Table S2:** List of vibrational modes of  $\text{C}_6\text{H}_6$  multilayer adsorbed on amorphous  $\text{CH}_3\text{OH}$  or on crystalline  $\text{CH}_3\text{CH}_2\text{OCH}_2\text{CH}_3$  at base temperature. The superscript <sup>†</sup> highlights that the frequency assignment can be obtained only by the RAIR spectrum subtracted with the  $\text{CH}_3\text{OH}$  single beam.

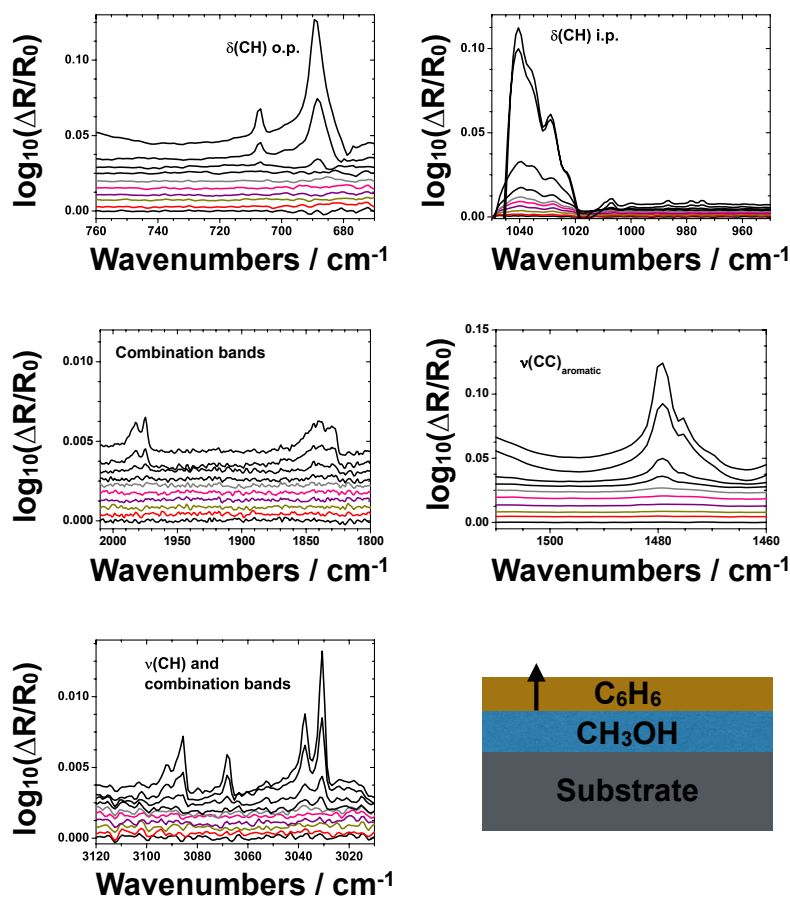

**Figure S9:** RAIR spectra of  $C_6H_6$  on a thick  $CH_3OH$  film (200 L) highlighting the evolution of the  $C_6H_6$  normal modes at increasing coverages of the aromatic molecule. Spectra have been offset for clarity and subtracted from the pure  $CH_3OH$  background.  $C_6H_6$  coverages are: 0 L (in black), 0.2 L (in red), 0.5 L (in dark yellow), 1 L (in violet), 2 L (in pink), and 5 L (in dark grey); the spectra relative to higher doses, 10 L, 20 L, 50 L, and 100 L, are reported in black lines. The negative feature, in the region of the  $\delta(CH)$  i.p. is attributed to a decreased IR intensity due to the  $CH_3OH$  film as more  $C_6H_6$  is dosed. Note that the initials i.p. and o.p. indicate in-plane and out-of-plane vibrational modes respectively. The cartoon at the bottom right corner of the figure is displayed to allow immediate understanding of the experiments performed. The arrow represents the increasing exposure of the aromatic species.

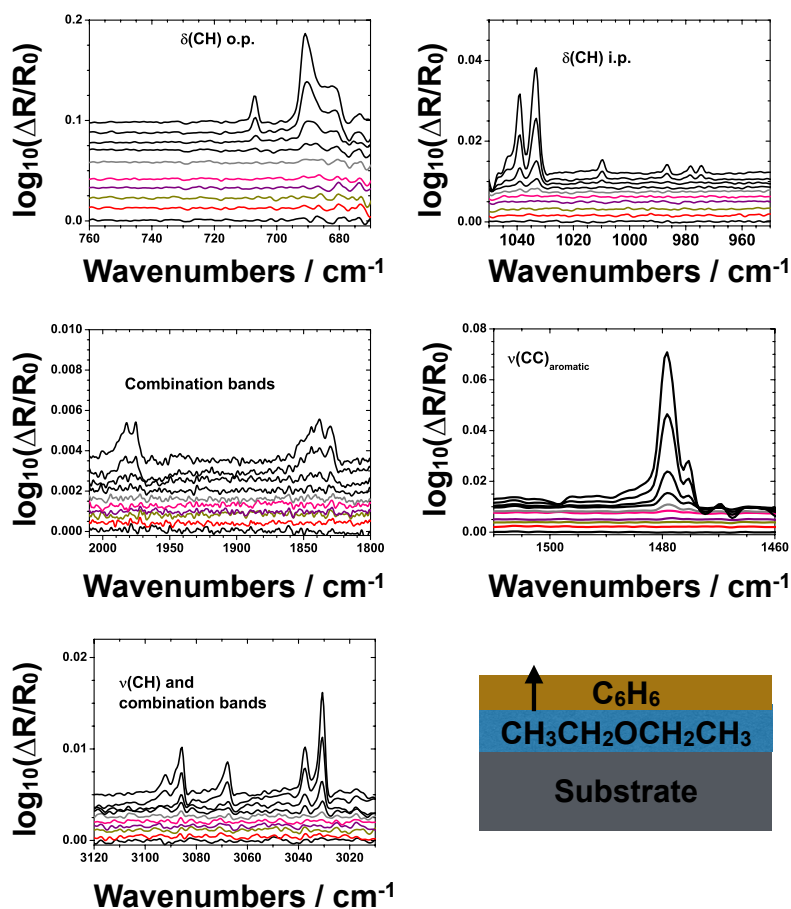

**Figure S10:** RAIR spectra of  $C_6H_6$  on a thick  $CH_3CH_2OCH_2CH_3$  film (200 L) highlighting the evolution of the  $C_6H_6$  normal modes at increasing coverages of the aromatic molecule. Spectra have been offset for clarity and subtracted from the pure  $CH_3CH_2OCH_2CH_3$  background.  $C_6H_6$  coverages are: 0.1 L (in black), 0.2 L (in red), 0.5 L (in dark yellow), 1 L (in violet), 2 L (in pink), and 5 L (in dark grey); the spectra relative to higher doses, 10 L, 20 L, 50 L, and 100 L, are reported in black lines. The negative feature, in the region  $CH_3$  and  $CH_2$  of the bending modes ( $\delta(CH)$ ) is attributed to a decreased intensity of the  $CH_3CH_2OCH_2CH_3$  frequencies as more  $C_6H_6$  is dosed. Note that the initials i.p. and o.p. indicate in-plane and out-of-plane vibrational modes respectively. The cartoon at the bottom right corner of the figure is displayed to allow immediate understanding of the experiments performed. The arrow represents the increasing exposure of the aromatic species.

### 3 Calculations

Computational details and references are reported in the main article. The global minimum for the dimethyl ether ( $\text{CH}_3\text{OCH}_3$ ) dimer is shown in **Figure S11a** and its geometry is consistent what was first reported by Tatamitani *et al.*<sup>13</sup>. For this structure, we obtained a binding energy of  $13.7 \text{ kJ mol}^{-1}$  which is intermediate between the values reported by more recent studies ( $16.3 \text{ kJ mol}^{-1}$ ,  $12.1 \text{ kJ mol}^{-1}$ )<sup>14,15</sup> on the same system. Starting from  $(\text{CH}_3\text{OCH}_3)_2$  we have built the corresponding  $(\text{CH}_3\text{CH}_2\text{OCH}_2\text{CH}_3)_2$  structure and optimised it at the same level of theory. The final geometry is displayed in **Figure S11b**. The binding energy, corrected for the basis set superposition error, is  $13.9 \text{ kJ mol}^{-1}$  for this dimer, which is almost identical to what found for  $\text{CH}_3\text{OCH}_3$ . This similarity

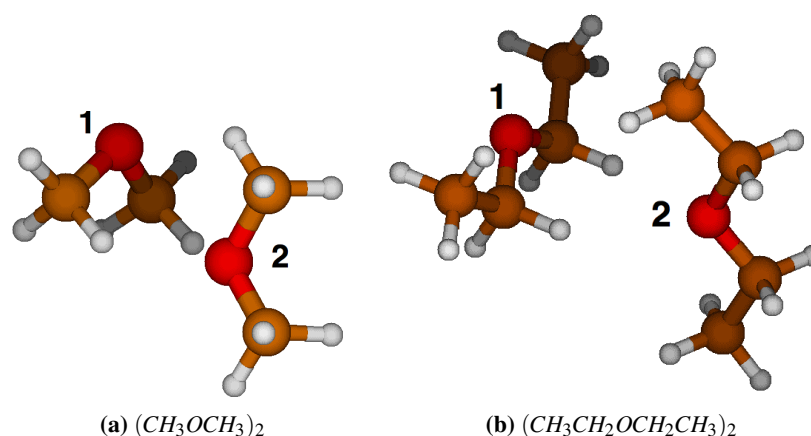

**Figure S11:** Global minima (GM) for  $(\text{CH}_3\text{OCH}_3)_2$  and  $(\text{CH}_3\text{CH}_2\text{OCH}_2\text{CH}_3)_2$ . Geometry optimisations were performed at MP2/aug-cc-pVDZ level followed by a single point with aug-cc-pVTZ basis set. Counterpoise (CP) correction was included at each step. The two fragments are labelled as 1 and 2 in both the pairs.

can be explained by looking at the equilibrium distances of the key interactions. There are four weak  $\text{CH}\cdots\text{O}$  interactions in the  $\text{CH}_3\text{CH}_2\text{OCH}_2\text{CH}_3$  dimer against three of the  $(\text{CH}_3\text{OCH}_3)_2$  dimer. As displayed in **Table S3**, two of the  $\text{CH}_1\cdots\text{O}_2$  interactions have the same equilibrium distances in both the pairs. However, the fragment labelled 2 in the  $(\text{CH}_3\text{CH}_2\text{OCH}_2\text{CH}_3)_2$  structure has two H-atoms facing the O-atom of the fragment 1 at long distances ( $3.19 \text{ \AA}$ ) as opposed to  $(\text{CH}_3\text{OCH}_3)_2$  where the  $\text{CH}_2\cdots\text{O}_1$  interaction is established at a shorter equilibrium distance ( $2.66 \text{ \AA}$ ). The compensation between the number of intermolecular interactions and their equilibrium distances results in similar binding energies for both the two dimers (**Figure S11**).

| Interaction                     | d / Å                                            |                                                                                  |
|---------------------------------|--------------------------------------------------|----------------------------------------------------------------------------------|
|                                 | (CH <sub>3</sub> OCH <sub>3</sub> ) <sub>2</sub> | (CH <sub>3</sub> CH <sub>2</sub> OCH <sub>2</sub> CH <sub>3</sub> ) <sub>2</sub> |
| CH <sub>1</sub> ⋯O <sub>2</sub> | 2.67                                             | 2.66                                                                             |
| CH <sub>2</sub> ⋯O <sub>1</sub> | 2.52                                             | 3.19                                                                             |

**Table S3:** List of values of the calculated equilibrium distances for the hydrogen bonding interactions established in (CH<sub>3</sub>OCH<sub>3</sub>)<sub>2</sub> and in (CH<sub>3</sub>CH<sub>2</sub>OCH<sub>2</sub>CH<sub>3</sub>)<sub>2</sub>. The subscripts refers to the two fragments as labelled in Figure S11.

### 3.1 Cartesian Coordinates

List of XYZ coordinates for the optimised geometries (MP2/aug-cc-pVDZ).

| Atom | X           | Y           | Z           |
|------|-------------|-------------|-------------|
| C    | 1.35183300  | -0.00116700 | 1.16353100  |
| O    | 1.45957000  | -0.00031200 | -0.25928300 |
| C    | 2.82479500  | 0.00090400  | -0.66027700 |
| H    | 0.28183600  | -0.00196400 | 1.40656100  |
| H    | 1.83270500  | -0.89921200 | 1.59307600  |
| H    | 1.83155000  | 0.89702100  | 1.59406700  |
| H    | 2.84239100  | 0.00149000  | -1.75732100 |
| H    | 3.34833600  | 0.89935700  | -0.28506500 |
| H    | 3.34966100  | -0.89716800 | -0.28600600 |
| O    | -2.06311600 | -0.00030000 | 0.47232300  |
| C    | -1.88679500 | 1.17092600  | -0.32184600 |
| C    | -1.88690000 | -1.17025800 | -0.32374200 |
| H    | -0.87245700 | -1.20155800 | -0.75896800 |
| H    | -2.03297500 | -2.03440700 | 0.33689400  |
| H    | -2.63262400 | -1.20669400 | -1.13933500 |
| H    | -0.87236100 | 1.20282300  | -0.75705300 |
| H    | -2.63253500 | 1.20876500  | -1.13736000 |
| H    | -2.03275800 | 2.03401900  | 0.34019400  |

**Table S4:**  $(CH_3OCH_3)_2$ .



---

| Atom | X           | Y           | Z           |
|------|-------------|-------------|-------------|
| C    | 1.96494300  | -0.00756600 | 1.58810700  |
| O    | 1.71740500  | -0.00168400 | 0.18001500  |
| C    | 2.93478300  | 0.00292800  | -0.56666100 |
| H    | 2.56089600  | -0.90223300 | 1.85395900  |
| H    | 2.55886000  | 0.88609400  | 1.86179200  |
| H    | 3.53122400  | 0.89653500  | -0.29847100 |
| H    | 3.53318700  | -0.89168400 | -0.30631400 |
| C    | 0.62733900  | -0.01223800 | 2.30657500  |
| H    | 0.04353600  | -0.90175300 | 2.03131200  |
| H    | 0.78524700  | -0.01692200 | 3.39576300  |
| H    | 0.04151000  | 0.87836300  | 2.03924800  |
| C    | 2.58334100  | 0.00902200  | -2.04418700 |
| H    | 3.50049900  | 0.01267100  | -2.65220900 |
| H    | 1.99531300  | -0.88351500 | -2.30145600 |
| H    | 1.99339100  | 0.90250800  | -2.29364000 |
| O    | -2.17125300 | 0.00104100  | -0.08529300 |
| C    | -1.64064500 | 1.18216000  | -0.69143400 |
| C    | -1.64186500 | -1.17497500 | -0.70232800 |
| H    | -0.53854900 | -1.16487500 | -0.62796200 |
| H    | -1.91256300 | -1.18087000 | -1.77697800 |
| H    | -0.53733500 | 1.17016400  | -0.61729000 |
| H    | -1.91145700 | 1.19834300  | -1.76595000 |
| C    | -2.22913500 | -2.38414600 | 0.00472600  |
| H    | -1.84706700 | -3.31131700 | -0.44901900 |
| H    | -1.95490900 | -2.37603900 | 1.06956400  |
| H    | -3.32573300 | -2.38017800 | -0.07295700 |
| C    | -2.22651000 | 2.38535000  | 0.02690100  |
| H    | -1.84348400 | 3.31627900  | -0.41826100 |
| H    | -3.32312100 | 2.38330300  | -0.05066600 |
| H    | -1.95215900 | 2.36706200  | 1.09158000  |

---

**Table S5:**  $(CH_3CH_2OCH_2CH_3)_2$ .

| Atom | X           | Y           | Z           |
|------|-------------|-------------|-------------|
| C    | -1.21922900 | 0.70340900  | -0.62925500 |
| C    | 0.00000000  | 1.40678400  | -0.63036500 |
| C    | 1.21923000  | 0.70341000  | -0.62925400 |
| C    | 1.21923100  | -0.70341000 | -0.62925400 |
| C    | 0.00000000  | -1.40678300 | -0.63036500 |
| C    | -1.21923200 | -0.70341000 | -0.62925400 |
| H    | -0.00000100 | 2.50013700  | -0.63630300 |
| H    | 2.16586100  | 1.24982800  | -0.62821800 |
| H    | 2.16586200  | -1.24982700 | -0.62821800 |
| H    | 0.00000000  | -2.50013700 | -0.63630300 |
| H    | -2.16586200 | -1.24982700 | -0.62821900 |
| H    | -2.16586000 | 1.24982700  | -0.62822000 |
| O    | 0.00000100  | 0.00000000  | 2.76186500  |
| H    | -0.00000100 | -0.75309800 | 2.15525700  |
| H    | 0.00000200  | 0.75309800  | 2.15525700  |

**Table S6:**  $wlb'_a$ .

| Atom | X           | Y           | Z           |
|------|-------------|-------------|-------------|
| C    | 0.78254000  | -0.60795500 | -1.22151700 |
| C    | 0.49749100  | 0.76984500  | -1.21597100 |
| C    | 0.35527800  | 1.45383700  | 0.00634800  |
| C    | 0.49720900  | 0.75920900  | 1.22268700  |
| C    | 0.78225800  | -0.61858600 | 1.21628600  |
| C    | 0.92550100  | -1.30167500 | -0.00560100 |
| H    | 0.13388900  | 2.52432200  | 0.01099200  |
| H    | 0.38239300  | 1.28965000  | 2.17134900  |
| H    | 0.89114600  | -1.15800900 | 2.16067200  |
| H    | 1.14941500  | -2.37173700 | -0.01024200 |
| H    | 0.89165200  | -1.13912200 | -2.17054500 |
| H    | 0.38288800  | 1.30853700  | -2.15999700 |
| O    | -2.79691600 | -0.26872300 | -0.00134000 |
| H    | -1.93529000 | 0.17345400  | 0.00091500  |
| H    | -2.56242600 | -1.20535600 | -0.00582700 |

**Table S7:**  $wlb'_b$ .

| Atom | X           | Y           | Z           |
|------|-------------|-------------|-------------|
| C    | -2.13201300 | -0.70390900 | 0.00045600  |
| C    | -2.13264900 | 0.70281800  | 0.00045700  |
| C    | -0.91402400 | 1.40613100  | -0.00013400 |
| C    | 0.30513300  | 0.70403100  | -0.00072600 |
| C    | 0.30577600  | -0.70292600 | -0.00072600 |
| C    | -0.91275000 | -1.40611800 | -0.00013500 |
| H    | -0.91543900 | 2.49960700  | -0.00013200 |
| H    | 1.25734900  | 1.23992100  | -0.00113500 |
| H    | 1.25848300  | -1.23793900 | -0.00113600 |
| H    | -0.91317400 | -2.49959500 | -0.00013300 |
| H    | -3.07876300 | -1.25084600 | 0.00091900  |
| H    | -3.07989300 | 1.24890000  | 0.00092000  |
| O    | 3.71645700  | -0.00024900 | 0.00053400  |
| H    | 4.31134600  | 0.00088500  | 0.76144500  |
| H    | 4.31160000  | 0.00088700  | -0.76017900 |

**Table S8:**  $w1b'$ .

| Atom | X           | Y           | Z           |
|------|-------------|-------------|-------------|
| C    | 0.82802800  | 1.29041800  | -0.70287300 |
| C    | 0.82817300  | 1.28953900  | 0.70442100  |
| C    | 1.03770900  | 0.08909600  | 1.40754100  |
| C    | 1.25031400  | -1.11123700 | 0.70320800  |
| C    | 1.25016300  | -1.11035700 | -0.70474900 |
| C    | 1.03741400  | 0.09085500  | -1.40753700 |
| H    | 1.41035600  | -2.04451600 | 1.24908500  |
| H    | 1.41008600  | -2.04295500 | -1.25182400 |
| H    | 1.03254800  | 0.09015600  | -2.50051500 |
| H    | 0.66328400  | 2.22305500  | -1.24880400 |
| H    | 0.66354300  | 2.22149300  | 1.25155100  |
| H    | 1.03306800  | 0.08703000  | 2.50051800  |
| O    | -2.20145500 | -0.93986100 | -0.00000600 |
| H    | -1.23453900 | -0.89251800 | -0.00000600 |
| C    | -2.70015600 | 0.40069900  | -0.00000300 |
| H    | -2.38064500 | 0.95755000  | 0.89706200  |
| H    | -2.38064900 | 0.95755200  | -0.89706800 |
| H    | -3.79528500 | 0.32795800  | 0.00000000  |

**Table S9:**  $m1b'$ .

---

| Atom | X           | Y           | Z           |
|------|-------------|-------------|-------------|
| C    | 2.48577300  | 0.70323600  | 0.34126800  |
| C    | 2.48562400  | -0.70346900 | 0.34130000  |
| C    | 1.34953100  | -1.40631200 | -0.10070200 |
| C    | 0.21324800  | -0.70357300 | -0.54147800 |
| C    | 0.21339900  | 0.70377500  | -0.54151100 |
| C    | 1.34982700  | 1.40629600  | -0.10076600 |
| H    | 1.35068000  | -2.49977600 | -0.10166500 |
| H    | -0.67618300 | -1.23929900 | -0.88282100 |
| H    | -0.67591300 | 1.23968000  | -0.88288500 |
| H    | 1.35120800  | 2.49976100  | -0.10178600 |
| H    | 3.36852500  | 1.24963600  | 0.68421300  |
| H    | 3.36826200  | -1.25003800 | 0.68426900  |
| O    | -3.07097500 | -0.00019200 | -0.52762800 |
| H    | -3.97738100 | -0.00034400 | -0.86063900 |
| C    | -3.12822800 | 0.00020900  | 0.90772000  |
| H    | -2.08839200 | 0.00032800  | 1.25659400  |
| H    | -3.63404800 | 0.89930700  | 1.29512500  |
| H    | -3.63400900 | -0.89869400 | 1.29563000  |

---

**Table S10:**  $mlb''$ .

---

| Atom | X           | Y           | Z           |
|------|-------------|-------------|-------------|
| C    | -1.55404300 | -0.70339500 | 1.21839100  |
| C    | -1.55404400 | 0.70340900  | 1.21838300  |
| C    | -1.55391100 | 1.40680100  | -0.00000800 |
| C    | -1.55404400 | 0.70339400  | -1.21839200 |
| C    | -1.55404400 | -0.70341000 | -1.21838400 |
| C    | -1.55391000 | -1.40680100 | 0.00000800  |
| H    | -1.55565600 | 2.50012800  | -0.00001600 |
| H    | -1.55624800 | 1.25000100  | -2.16525400 |
| H    | -1.55624700 | -1.25002500 | -2.16524100 |
| H    | -1.55565400 | -2.50012800 | 0.00001600  |
| H    | -1.55624600 | -1.25000100 | 2.16525300  |
| H    | -1.55624700 | 1.25002600  | 2.16523900  |
| O    | 3.09217200  | -0.00000100 | 0.00000100  |
| C    | 2.27945700  | 1.16855800  | -0.00000800 |
| C    | 2.27945600  | -1.16855900 | 0.00000700  |
| H    | 2.95560400  | 2.03296200  | -0.00001200 |
| H    | 1.63259600  | 1.20399400  | -0.89588900 |
| H    | 1.63259300  | 1.20400500  | 0.89587200  |
| H    | 2.95560200  | -2.03296300 | 0.00001400  |
| H    | 1.63259200  | -1.20399300 | 0.89588700  |
| H    | 1.63259500  | -1.20400500 | -0.89587400 |

---

**Table S11:**  $dm1b'$ .

---

| Atom | X           | Y           | Z           |
|------|-------------|-------------|-------------|
| C    | 1.88864000  | 1.40636400  | -0.12009400 |
| C    | 3.06701900  | 0.70337200  | 0.19183400  |
| C    | 3.06702400  | -0.70334500 | 0.19185700  |
| C    | 1.88865300  | -1.40636100 | -0.12004500 |
| C    | 0.71008300  | -0.70368600 | -0.43067900 |
| C    | 0.71007700  | 0.70366500  | -0.43070300 |
| H    | 1.88982100  | -2.49983100 | -0.12103000 |
| H    | -0.21219600 | -1.23901100 | -0.67060600 |
| H    | -0.21220500 | 1.23897300  | -0.67065100 |
| H    | 1.88979500  | 2.49983400  | -0.12111700 |
| H    | 3.98257600  | 1.24983700  | 0.43379600  |
| H    | 3.98258600  | -1.24979300 | 0.43383800  |
| C    | -2.52038800 | 0.00006600  | 1.25784400  |
| O    | -2.56084100 | -0.00016700 | -0.16639100 |
| C    | -3.90628500 | 0.00003900  | -0.63132900 |
| H    | -1.46314700 | -0.00010400 | 1.55157400  |
| H    | -3.01685700 | 0.89894800  | 1.66721900  |
| H    | -3.01723400 | -0.89846800 | 1.66752400  |
| H    | -4.44708600 | 0.89860900  | -0.28202300 |
| H    | -3.87079900 | -0.00015900 | -1.72779500 |
| H    | -4.44746900 | -0.89817900 | -0.28171200 |

---

**Table S12:**  $dm1b''$ .

---

| Atom | X           | Y           | Z           |
|------|-------------|-------------|-------------|
| C    | 0.00000000  | 1.40683900  | -2.15538300 |
| C    | 1.21839600  | 0.70340500  | -2.15569900 |
| C    | 1.21839600  | -0.70340500 | -2.15569900 |
| C    | 0.00000000  | -1.40683900 | -2.15538300 |
| C    | -1.21839600 | -0.70340500 | -2.15569900 |
| C    | -1.21839600 | 0.70340500  | -2.15569900 |
| H    | 0.00000000  | -2.50021400 | -2.15662600 |
| H    | 2.16527300  | -1.25001600 | -2.15734000 |
| H    | -2.16527300 | -1.25001600 | -2.15734000 |
| H    | 2.16527300  | 1.25001600  | -2.15734000 |
| H    | -2.16527300 | 1.25001600  | -2.15734000 |
| H    | 0.00000000  | 2.50021400  | -2.15662600 |
| C    | 0.00000000  | -1.17726100 | 1.63771700  |
| O    | 0.00000000  | 0.00000000  | 2.44683000  |
| C    | 0.00000000  | 1.17726100  | 1.63771700  |
| C    | 0.00000000  | -2.38615900 | 2.55645500  |
| H    | -0.89150700 | -1.17678200 | 0.98090100  |
| H    | 0.89150700  | -1.17678200 | 0.98090100  |
| C    | 0.00000000  | 2.38615900  | 2.55645500  |
| H    | 0.89150700  | 1.17678200  | 0.98090100  |
| H    | -0.89150700 | 1.17678200  | 0.98090100  |
| H    | 0.00000000  | 3.31273200  | 1.96226800  |
| H    | -0.89278000 | 2.37988700  | 3.19778400  |
| H    | 0.89278000  | 2.37988700  | 3.19778400  |
| H    | 0.00000000  | -3.31273200 | 1.96226800  |
| H    | 0.89278000  | -2.37988700 | 3.19778400  |
| H    | -0.89278000 | -2.37988700 | 3.19778400  |

---

**Table S13:** *de1b'*.

---

| Atom | X           | Y           | Z           |
|------|-------------|-------------|-------------|
| C    | 1.14605300  | -0.00002000 | -0.74852300 |
| C    | 2.40260400  | 0.00001100  | -1.38157000 |
| C    | 3.58086900  | 0.00001300  | -0.61236000 |
| C    | 3.50383800  | -0.00001400 | 0.79232300  |
| C    | 2.24821300  | -0.00004300 | 1.42727300  |
| C    | 1.07104900  | -0.00004400 | 0.65673700  |
| H    | 2.18848700  | -0.00006200 | 2.51913000  |
| H    | 0.09124500  | -0.00006500 | 1.14159800  |
| H    | 0.22292300  | -0.00002000 | -1.33343800 |
| H    | 2.46392700  | 0.00002900  | -2.47329000 |
| H    | 4.55652700  | 0.00003600  | -1.10579800 |
| H    | 4.41934400  | -0.00001200 | 1.38999300  |
| C    | -2.62341100 | -1.18129600 | 0.40400600  |
| O    | -2.18299600 | 0.00001600  | -0.26781000 |
| C    | -2.62336300 | 1.18133300  | 0.40402700  |
| C    | -2.08609200 | 2.38495000  | -0.35006100 |
| H    | -3.72994200 | 1.19607500  | 0.44224700  |
| H    | -2.25203000 | 1.17330900  | 1.44816700  |
| C    | -2.08617900 | -2.38492200 | -0.35009500 |
| H    | -3.72999200 | -1.19599700 | 0.44221600  |
| H    | -2.25208700 | -1.17330000 | 1.44814900  |
| H    | -2.41487700 | -3.31444200 | 0.13874400  |
| H    | -2.45625400 | -2.38285500 | -1.38521800 |
| H    | -0.98697600 | -2.36631800 | -0.36709900 |
| H    | -2.41473600 | 3.31447600  | 0.13880300  |
| H    | -0.98689000 | 2.36629200  | -0.36708700 |
| H    | -2.45618800 | 2.38292100  | -1.38517600 |

---

**Table S14:** *de1b''*.



---

| Atom | X           | Y           | Z           |
|------|-------------|-------------|-------------|
| C    | -3.11398100 | 0.16215400  | 0.45053700  |
| C    | -2.72376900 | -1.10905100 | -0.01360100 |
| C    | -1.74260300 | -1.22106800 | -1.01643700 |
| C    | -1.14990600 | -0.06393700 | -1.55324500 |
| C    | -1.54015300 | 1.20659000  | -1.09217700 |
| C    | -2.52323400 | 1.32017100  | -0.09138900 |
| H    | -3.18195100 | -2.00810700 | 0.40719700  |
| H    | -1.42785000 | -2.20668400 | -1.36812700 |
| H    | -0.37217300 | -0.15310900 | -2.31533300 |
| H    | -1.06432300 | 2.10187900  | -1.49913500 |
| H    | -2.82501800 | 2.30692000  | 0.26993400  |
| H    | -3.87650700 | 0.24997600  | 1.22919600  |
| O    | 0.32353800  | -0.03363700 | 1.61761000  |
| H    | 0.66725000  | 0.72827500  | 1.11667700  |
| H    | 1.21454100  | -1.22638600 | 0.41666100  |
| O    | 1.78108800  | -1.46878700 | -0.34586900 |
| H    | 2.06533500  | 0.46693100  | -0.61215600 |
| O    | 1.84320900  | 1.40397300  | -0.44849300 |
| H    | 2.43987600  | -2.07240800 | 0.01948300  |
| H    | 2.69632000  | 1.84274800  | -0.34050400 |
| H    | -0.62923100 | -0.01514400 | 1.44063800  |

---

**Table S15:**  $w3b'$ .

---

| Atom | X           | Y           | Z           |
|------|-------------|-------------|-------------|
| C    | 2.28301600  | 1.05288500  | 0.58705800  |
| C    | 3.14544300  | -0.06068300 | 0.53842500  |
| C    | 3.00584200  | -1.01199700 | -0.48982600 |
| C    | 2.00442900  | -0.84957600 | -1.46658000 |
| C    | 1.14017300  | 0.25997200  | -1.41562000 |
| C    | 1.27969000  | 1.21323100  | -0.38893100 |
| H    | 0.34966900  | 0.39171200  | -2.15767000 |
| H    | 0.59761600  | 2.06613500  | -0.35769100 |
| H    | 2.39513300  | 1.79446000  | 1.38286500  |
| H    | 3.92325900  | -0.18425900 | 1.29670800  |
| H    | 3.67808900  | -1.87336000 | -0.53148200 |
| H    | 1.89911900  | -1.58740600 | -2.26677200 |
| O    | -0.04607400 | -1.31991600 | 1.54980400  |
| H    | 0.66338300  | -0.71042700 | 1.28637100  |
| O    | -1.76627200 | 1.85015500  | -1.41404000 |
| O    | -2.45642700 | -0.11834300 | 0.58156500  |
| H    | -2.57254500 | 2.09245100  | -1.88490300 |
| H    | -1.65348000 | -0.55815100 | 0.92618400  |
| H    | 0.19028200  | -2.14452100 | 1.10451800  |
| H    | -2.95007700 | 0.13200600  | 1.37197800  |
| H    | -2.06347100 | 1.20234000  | -0.74593300 |

---

**Table S16:**  $w3b''$ .

---

| Atom | X           | Y           | Z           |
|------|-------------|-------------|-------------|
| C    | 2.34127500  | 1.24177300  | 0.10903800  |
| C    | 2.90743100  | 0.01260300  | 0.50192700  |
| C    | 2.54841600  | -1.17342000 | -0.16879500 |
| C    | 1.62464300  | -1.13061100 | -1.22951700 |
| C    | 1.06276000  | 0.09850600  | -1.62411100 |
| C    | 1.41936800  | 1.28523800  | -0.95622700 |
| H    | 0.33181000  | 0.12228100  | -2.43567700 |
| H    | 0.96448200  | 2.23641500  | -1.24234300 |
| H    | 2.61179300  | 2.16228300  | 0.63295100  |
| H    | 3.62491400  | -0.01977300 | 1.32646700  |
| H    | 2.98596900  | -2.12754500 | 0.13728200  |
| H    | 1.32423800  | -2.05067700 | -1.73599100 |
| O    | -0.47280900 | -0.14282800 | 1.35305200  |
| C    | -0.24399700 | -0.97671900 | 2.50436800  |
| H    | 0.39532300  | 0.11032800  | 0.99410600  |
| H    | 0.27909400  | -1.90321700 | 2.22048700  |
| H    | 0.33828900  | -0.44331200 | 3.27119800  |
| H    | -1.23078300 | -1.22727900 | 2.91217800  |
| O    | -1.53642600 | 2.48179600  | 0.56337900  |
| C    | -2.39096600 | 2.11120700  | -0.52192500 |
| O    | -1.61849700 | -1.67051500 | -0.89091000 |
| C    | -2.97225600 | -1.93166600 | -0.51378300 |
| H    | -1.29571300 | 1.66335600  | 1.02715800  |
| H    | -1.21418400 | -1.15082900 | -0.17368100 |
| H    | -3.42565800 | -2.51538700 | -1.32526500 |
| H    | -3.03525800 | -2.52137700 | 0.41718700  |
| H    | -3.55108700 | -1.00106000 | -0.38520700 |
| H    | -2.56898700 | 3.01857700  | -1.11383200 |
| H    | -1.92810800 | 1.34722600  | -1.17024800 |
| H    | -3.36431200 | 1.73089300  | -0.16678800 |

---

**Table S17:** *m3b'*.

---

| Atom | X           | Y           | Z           |
|------|-------------|-------------|-------------|
| C    | -3.57115200 | 0.28565000  | 0.14072200  |
| C    | -3.23551200 | -1.03725900 | -0.20195900 |
| C    | -2.02292900 | -1.30557500 | -0.86430300 |
| C    | -1.14583200 | -0.25273400 | -1.18432600 |
| C    | -1.48075700 | 1.07074000  | -0.84117700 |
| C    | -2.69344700 | 1.33845100  | -0.17894400 |
| H    | -3.91684800 | -1.85575700 | 0.04593500  |
| H    | -1.75958300 | -2.33308500 | -1.12960900 |
| H    | -0.20138500 | -0.46706700 | -1.69074700 |
| H    | -0.78822100 | 1.88115900  | -1.08125300 |
| H    | -2.95482100 | 2.36630400  | 0.08759700  |
| H    | -4.51321900 | 0.49517200  | 0.65470200  |
| C    | -0.26465100 | -0.24770800 | 2.39030100  |
| O    | 0.98440900  | -0.15457200 | 1.68537900  |
| H    | 0.97288700  | 0.63989100  | 1.11900400  |
| H    | -0.20740400 | -1.14994200 | 3.01235900  |
| H    | -0.41508900 | 0.62483000  | 3.04578400  |
| H    | -1.11560800 | -0.33735200 | 1.69766300  |
| H    | 1.62454400  | -1.19985900 | 0.25372800  |
| O    | 2.07117700  | -1.31901300 | -0.61012200 |
| C    | 3.28714000  | -2.04461300 | -0.38373900 |
| H    | 3.80705100  | -2.11097100 | -1.34773300 |
| H    | 3.08298100  | -3.06456700 | -0.02109400 |
| H    | 3.93959600  | -1.52995700 | 0.34070700  |
| H    | 2.02025800  | 0.60009800  | -0.78386400 |
| O    | 1.80369300  | 1.51527800  | -0.51494000 |
| C    | 3.04093200  | 2.18719200  | -0.24165100 |
| H    | 3.67421800  | 2.24865700  | -1.14128000 |
| H    | 3.60448400  | 1.68881300  | 0.56482000  |
| H    | 2.78918700  | 3.20521400  | 0.08119700  |

---

**Table S18:**  $m3b''$ .

---

| Atom | X           | Y           | Z           |
|------|-------------|-------------|-------------|
| C    | 3.67468600  | -0.10677200 | -1.23066500 |
| C    | 3.16557700  | 1.18957200  | -1.03021000 |
| C    | 2.69781700  | 1.57254400  | 0.24011100  |
| C    | 2.73980500  | 0.65967500  | 1.31011000  |
| C    | 3.25033700  | -0.63565100 | 1.10995400  |
| C    | 3.71733500  | -1.01916600 | -0.16054200 |
| H    | 2.37689700  | 0.95773200  | 2.29743200  |
| H    | 2.30290600  | 2.58006200  | 0.39614000  |
| H    | 3.28474200  | -1.34418700 | 1.94188700  |
| H    | 3.13343500  | 1.89896100  | -1.86136600 |
| H    | 4.11502000  | -2.02562400 | -0.31599500 |
| H    | 4.03864600  | -0.40439900 | -2.21764000 |
| C    | -1.11359400 | 0.00136100  | 0.90494700  |
| O    | -1.25597400 | -0.76436400 | -0.29012700 |
| C    | -0.00174200 | -1.31963500 | -0.67947300 |
| H    | -2.10546700 | 0.40010800  | 1.15411800  |
| H    | -0.74536700 | -0.63081000 | 1.73470600  |
| H    | -0.40046600 | 0.83273900  | 0.75593700  |
| H    | -0.17113000 | -1.88312300 | -1.60621000 |
| H    | 0.74790700  | -0.52816700 | -0.85848200 |
| H    | 0.38765900  | -2.00138900 | 0.09907000  |
| O    | -4.51315500 | 0.63747800  | 0.36335400  |
| C    | -4.15730600 | 1.15560300  | -0.91669000 |
| C    | -4.73847200 | -0.76861900 | 0.28338400  |
| H    | -3.83004200 | -1.29436300 | -0.05953800 |
| H    | -5.00552300 | -1.10959300 | 1.29186600  |
| H    | -5.57134100 | -0.99414600 | -0.40824400 |
| H    | -3.23477200 | 0.67889700  | -1.29228000 |
| H    | -4.97221000 | 0.99356800  | -1.64649200 |
| H    | -3.99359800 | 2.23389500  | -0.79338000 |

---

**Table S19:**  $dm2b'$ .

---

| Atom | X           | Y           | Z           |
|------|-------------|-------------|-------------|
| C    | -1.51352200 | -1.49024000 | -0.06530700 |
| C    | -1.93778400 | -0.97753800 | 1.17408200  |
| C    | -2.77366700 | 0.15369700  | 1.22267100  |
| C    | -3.18660000 | 0.77430100  | 0.02955000  |
| C    | -2.76591500 | 0.26071600  | -1.21132100 |
| C    | -1.93071900 | -0.87051000 | -1.25754700 |
| H    | -3.08868400 | 0.74089100  | -2.13914900 |
| H    | -1.59985900 | -1.26725600 | -2.22117700 |
| H    | -0.84606100 | -2.35447300 | -0.10676700 |
| H    | -1.61911100 | -1.45852100 | 2.10307400  |
| H    | -3.10251500 | 0.54994500  | 2.18722000  |
| H    | -3.83599000 | 1.65314700  | 0.06628600  |
| O    | 1.90565500  | -1.87151200 | -0.15260700 |
| C    | 3.08292300  | -1.48675700 | -0.86084400 |
| C    | 2.02038300  | -1.51670600 | 1.22448600  |
| H    | 1.08765700  | -1.82270100 | 1.71597100  |
| H    | 2.87032000  | -2.04436100 | 1.69581700  |
| H    | 2.15911200  | -0.42743800 | 1.34065600  |
| H    | 3.97086800  | -2.01211800 | -0.46319400 |
| H    | 2.93517700  | -1.77137900 | -1.91051800 |
| H    | 3.24721300  | -0.39680500 | -0.78956200 |
| O    | 1.89996000  | 1.82202000  | 0.00502200  |
| C    | 0.66482700  | 1.38729500  | -0.56694200 |
| C    | 1.82325000  | 3.19215100  | 0.37898800  |
| H    | -0.16825400 | 1.49997000  | 0.15113100  |
| H    | 0.42939800  | 1.96645900  | -1.47927000 |
| H    | 0.77799600  | 0.32598500  | -0.81864100 |
| H    | 2.79261600  | 3.46779300  | 0.81337800  |
| H    | 1.62026400  | 3.83306000  | -0.49886500 |
| H    | 1.02588000  | 3.35527700  | 1.12739800  |

---

**Table S20:**  $dm2b''$ .

## 4 Acknowledgments

The authors would like to acknowledge the use of the EPSRC UK National Service for Computational Chemistry Software (NSCCS) at Imperial College London and contributions from its staff in carrying out this work.

## References

- [1] D. A. King, *Surf. Sci.*, 1975, **47**, 384–402.
- [2] G. Attard and C. Barnes, *Surfaces*, Oxford University Press, 2011.
- [3] P. A. Redhead, *Vacuum*, 1962, **12**, 203.
- [4] R. S. Smith, J. Matthiesen and B. D. Kay, *J. Phys. Chem. A*, 2014, **118**, 8242.
- [5] C. J. Craven, P. D. Hatton, C. J. Howard and G. S. Pawley, *J. Chem. Phys.*, 1993, **98**, 8236–8243.
- [6] A. S. Bolina, A. J. Wolff and W. A. Brown, *J. Chem. Phys.*, 2005, **122**, 044713.
- [7] D. Marchione, *PhD thesis*, Heriot-Watt University, 2015.
- [8] F. C. Calaza, T. L. Chen, D. R. Mullins and S. H. Overbury, *Top. Catal.*, 2011, **54**, 56.
- [9] J. M. Meyers and S. C. Street, *Langmuir*, 1996, **12**, 1511.
- [10] J. D. Thrower, *PhD thesis*, Heriot-Watt University, 2009.
- [11] G. Strazzulla and G. A. Baratta, *Astron. Astrophys.*, 1991, **241**, 310.
- [12] R. Ruiterkamp, Z. Peeters, M. H. Moore, R. L. Hudson and P. Ehrenfreund, *Astron. Astrophys.*, 2005, **440**, 391.
- [13] Y. Tatamitani, B. Liu, J. Shimada, T. Ogata, P. Ottaviani, A. Maris, W. Caminati and J. L. Alonso, *J. Am. Chem. Soc.*, 2002, **124**, 2739–2743.
- [14] A. Karpfen and E. S. Kryachko, *Phys. Chem. Lett.*, 2006, **431**, 428–433.
- [15] B. L. Yoder, K. B. Bravaya, A. Bodi, A. H. C. West, B. Sztáray and R. Signorell, *J. Chem. Phys.*, 2015, **142**, 114303–1.
